# Supplementary material for: Do Implicit Attitudes Predict Actual Voting Behavior Particularly for Undecided Voters?
Source: PubMed Central journal article supplement (PMC3430672; doi:10.1371/journal.pone.0044130), 2012-08-29
Supplement: pone.0044130.s006.pdf [file pone.0044130.s006.pdf]

Table S5. Results of multiple binary logistic regression analyses involving the political camps IAT in Study 2, including a second indicator of explicit attitudes ( $Explicit_{party-based}$ , see main manuscript for details). This table corresponds to Table 5 in the main manuscript.

| Step | Variable                          | B     | SE   | Wald    | <i>p</i> | Exp(B) | Nagel-<br>kerke's<br>R <sup>2</sup> | %<br>CCC |
|------|-----------------------------------|-------|------|---------|----------|--------|-------------------------------------|----------|
| 1    | Constant                          | -.039 | .104 | .140    | .709     | .962   | .472                                | 80.0     |
|      | IAT <sub>camps</sub>              | 1.747 | .139 | 158.065 | < .001   | 5.736  |                                     |          |
| 2    | Constant                          | -.165 | .154 | 1.150   | .284     | .848   | .505                                | 79.7     |
|      | IAT <sub>camps</sub>              | .992  | .188 | 27.773  | < .001   | 2.698  |                                     |          |
|      | Decidedness                       | .194  | .211 | .840    | .359     | 1.214  |                                     |          |
|      | IAT <sub>camps</sub> *Decidedness | 1.334 | .287 | 21.644  | < .001   | 3.797  |                                     |          |
| 3    | Constant                          | -.260 | .190 | 1.873   | .171     | .771   | .789                                | 89.5     |
|      | IAT <sub>camps</sub>              | -.010 | .239 | .002    | .967     | .990   |                                     |          |
|      | Decidedness                       | .370  | .301 | 1.510   | .219     | 1.447  |                                     |          |
|      | IAT <sub>camps</sub> *            | .509  | .381 | 1.785   | .182     | 1.664  |                                     |          |
|      | Decidedness                       |       |      |         |          |        |                                     |          |
|      | Explicit <sub>camps</sub>         | 1.408 | .295 | 22.760  | < .001   | 14.088 |                                     |          |
|      | Explicit <sub>party-based</sub>   | 2.673 | .453 | 34.811  | < .001   | 14.488 |                                     |          |
| 4    | Constant                          | -.220 | .188 | 1.364   | .243     | .803   | .792                                | 90.0     |
|      | IAT <sub>camps</sub>              | .037  | .238 | 0.25    | .875     | 1.038  |                                     |          |
|      | Decidedness                       | .450  | .314 | 2.053   | .152     | 1.568  |                                     |          |
|      | IAT <sub>camps</sub> *            | .269  | .406 | .439    | .508     | 1.309  |                                     |          |
|      | Decidedness                       |       |      |         |          |        |                                     |          |
|      | Explicit <sub>camps</sub>         | 1.072 | .436 | 6.039   | .014     | 2.923  |                                     |          |

---

|                                                  |       |      |        |        |        |
|--------------------------------------------------|-------|------|--------|--------|--------|
| Explicit <sub>party-based</sub>                  | 2.792 | .472 | 34.934 | < .001 | 16.313 |
| Explicit <sub>camps</sub> *                      | .709  | .552 | 1.650  | .199   | 2.032  |
| Decidedness                                      |       |      |        |        |        |
| IAT <sub>camps</sub> * Explicit <sub>camps</sub> | -.508 | .325 | 2.450  | .118   | .602   |

---

*Note.*  $N = 610$ . B: regression weight B; *SE*: standard error of the regression weight B; Wald:

Wald criterion;  $\text{Exp}(B)$ : Odds ratio. Relative amount by which the odds increase ( $\text{Exp}(B) > 1.0$ )

or decrease ( $\text{Exp}(B) < 1.0$ ) when the value of the predictor is increased by 1 unit; CCC:

correctly classified cases; DV: voting behavior (0 = right political camp, 1 = left political

camp). All continuous variables were z-standardized prior to the analyses.

---
