# Supplementary material for: Do Implicit Attitudes Predict Actual Voting Behavior Particularly for Undecided Voters?
Source: PubMed Central journal article supplement (PMC3430672; doi:10.1371/journal.pone.0044130), 2012-08-29
Supplement: pone.0044130.s007.pdf [file pone.0044130.s007.pdf]

Table S6. Results of the multiple binary logistic regression analyses involving the candidates IAT in Study 2, separately for decided and undecided voters and including a second indicator of explicit attitudes ( $\text{Explicit}_{\text{party-based}}$ , see main manuscript for details). This table corresponds to Table 6 in the main manuscript.

| Step                               | Variable                        | B     | SE   | Wald   | <i>p</i> | Exp(B) | Nagel-<br>kerke's<br>R <sup>2</sup> | %<br>CCC |
|------------------------------------|---------------------------------|-------|------|--------|----------|--------|-------------------------------------|----------|
| Decided voters ( <i>N</i> = 410)   |                                 |       |      |        |          |        |                                     |          |
| 1a                                 | Constant                        | .162  | .122 | 1.776  | .183     | 1.176  | .412                                | 79.3     |
|                                    | IAT <sub>candidates</sub>       | 1.545 | .156 | 98.621 | < .001   | 2.038  |                                     |          |
| 1b                                 | Constant                        | .183  | .217 | .714   | .398     | 1.201  | .849                                | 92.9     |
|                                    | Explicit <sub>candidates</sub>  | .910  | .297 | 9.378  | .002     | 2.484  |                                     |          |
|                                    | Explicit <sub>party-based</sub> | 4.203 | .561 | 56.189 | < .001   | 66.918 |                                     |          |
| 2                                  | Constant                        | .200  | .220 | .834   | .361     | 1.222  | .851                                | 93.7     |
|                                    | IAT <sub>candidates</sub>       | .298  | .250 | 1.421  | .233     | 1.347  |                                     |          |
|                                    | Explicit <sub>candidates</sub>  | .830  | .304 | 7.465  | .006     | 2.294  |                                     |          |
|                                    | Explicit <sub>party-based</sub> | 4.065 | .557 | 53.233 | < .001   | 58.258 |                                     |          |
| Undecided voters ( <i>N</i> = 210) |                                 |       |      |        |          |        |                                     |          |
| 1a                                 | Constant                        | -.144 | .146 | .975   | .323     | .866   | .138                                | 65.7     |
|                                    | IAT <sub>candidates</sub>       | .712  | .159 | 19.989 | < .001   | 2.038  |                                     |          |
| 1b                                 | Constant                        | -.263 | .182 | 2.077  | .150     | .769   | .526                                | 81.4     |
|                                    | Explicit <sub>candidates</sub>  | .147  | .218 | .455   | .500     | 1.158  |                                     |          |
|                                    | Explicit <sub>party-based</sub> | 2.342 | .383 | 37.458 | < .001   | 10.405 |                                     |          |
| 2                                  | Constant                        | -.254 | .183 | 1.923  | .165     | .776   | .527                                | 81.0     |
|                                    | IAT <sub>candidates</sub>       | .114  | .205 | .306   | .580     | 1.120  |                                     |          |

---

|                                 |       |      |        |        |       |
|---------------------------------|-------|------|--------|--------|-------|
| Explicit <sub>candidates</sub>  | .120  | .224 | .287   | .592   | 1.127 |
| Explicit <sub>party-based</sub> | 2.288 | .392 | 34.147 | < .001 | 9.856 |

---

*Note.* B: regression weight B; *SE*: standard error of the regression weight B; Wald: Wald criterion; Exp(B): Odds ratio. Relative amount by which the odds increase (Exp(B) > 1.0) or decrease (Exp(B) < 1.0) when the value of the predictor is increased by 1 unit; CCC: correctly classified cases; DV: voting behavior (0 = right political camp, 1 = left political camp). All continuous variables were z-standardized separately for decided and undecided voters prior to the analyses.

---
