# Supplementary material for: Do Implicit Attitudes Predict Actual Voting Behavior Particularly for Undecided Voters?
Source: PubMed Central journal article supplement (PMC3430672; doi:10.1371/journal.pone.0044130), 2012-08-29
Supplement: pone.0044130.s008.pdf [file pone.0044130.s008.pdf]

Table S7. Results of multiple binary logistic regression analyses involving the candidates IAT in Study 2, including a second indicator of explicit attitudes ( $\text{Explicit}_{\text{party-based}}$ , see main manuscript for details). This table corresponds to Table 7 in the main manuscript.

| Step | Variable                        | B     | SE   | Wald    | <i>p</i> | Exp(B) | Nagel-<br>kerke's<br>R <sup>2</sup> | %<br>CCC |
|------|---------------------------------|-------|------|---------|----------|--------|-------------------------------------|----------|
| 1    | Constant                        | .036  | .092 | .149    | .700     | 1.036  | .310                                | 74.0     |
|      | IAT <sub>candidates</sub>       | 1.219 | .111 | 120.220 | < .001   | 3.385  |                                     |          |
| 2    | Constant                        | -.054 | .147 | .136    | .713     | .947   | .329                                | 74.7     |
|      | IAT <sub>candidates</sub>       | .739  | .165 | 19.989  | < .001   | 2.093  |                                     |          |
|      | Decidedness                     | .121  | .190 | .403    | .525     | 1.128  |                                     |          |
|      | IAT <sub>candidates</sub> *     | .786  | .226 | 12.134  | < .001   | 2.194  |                                     |          |
|      | Decidedness                     |       |      |         |          |        |                                     |          |
| 3    | Constant                        | -.321 | .189 | 2.899   | .089     | .725   | .758                                | 89.4     |
|      | IAT <sub>candidates</sub>       | .058  | .207 | .079    | .778     | 1.060  |                                     |          |
|      | Decidedness                     | .481  | .284 | 2.874   | .090     | 1.618  |                                     |          |
|      | IAT <sub>candidates</sub> *     | .294  | .309 | .908    | .341     | 1.342  |                                     |          |
|      | Decidedness                     |       |      |         |          |        |                                     |          |
|      | Explicit <sub>candidates</sub>  | .479  | .201 | 5.673   | .017     | 1.615  |                                     |          |
|      | Explicit <sub>party-based</sub> | 3.612 | .387 | 87.166  | < .001   | 37.040 |                                     |          |
| 4    | Constant                        | -.301 | .191 | 2.488   | .115     | .740   | .760                                | 89.5     |
|      | IAT <sub>candidates</sub>       | .124  | .210 | .348    | .556     | 1.132  |                                     |          |
|      | Decidedness                     | .502  | .288 | 3.044   | .081     | 1.652  |                                     |          |
|      | IAT <sub>candidates</sub> *     | .177  | .324 | .298    | .585     | 1.193  |                                     |          |
|      | Decidedness                     |       |      |         |          |        |                                     |          |

---

|                                  |       |      |        |        |        |
|----------------------------------|-------|------|--------|--------|--------|
| Explicit <sub>candidates</sub>   | .185  | .289 | .410   | .522   | 1.203  |
| Explicit <sub>party-based</sub>  | 3.590 | .386 | 86.443 | < .001 | 36.224 |
| Explicit <sub>candidates</sub> * | .561  | .396 | 2.010  | .156   | 1.752  |
| Decidedness                      |       |      |        |        |        |
| IAT <sub>candidates</sub> *      | .071  | .215 | .108   | .742   | 1.073  |
| Explicit <sub>candidates</sub>   |       |      |        |        |        |

---

*Note.*  $N = 620$ . B: regression weight B; *SE*: standard error of the regression weight B; Wald: Wald criterion; Exp(B): Odds ratio. Relative amount by which the odds increase ( $\text{Exp}(B) > 1.0$ ) or decrease ( $\text{Exp}(B) < 1.0$ ) when the value of the predictor is increased by 1 unit; CCC: correctly classified cases; DV: voting behavior (0 = right political camp, 1 = left political camp). All continuous variables were z-standardized prior to the analyses.

---
